# Supplementary material for: Aliphatic thermoplastic polyurethane-ureas and polyureas synthesized through a non-isocyanate route
Source: Royal Society of Chemistry journal article supplement (doi:10.1039/c4ra12195c), 2014-12-16
Supplement: c4ra12195c1.pdf [file c4ra12195c1.pdf]

## Aliphatic thermoplastic polyurethane-ureas and polyureas synthesized through a non-isocyanate route

Suqing Li, Jingbo Zhao\*, Zhiyuan Zhang, Junying Zhang and Wantai Yang

Key Laboratory of Carbon Fiber and Functional Polymers(Beijing University of Chemical Technology), Ministry of Education; State Key Laboratory of Chemical Resource Engineering, College of Materials Science and Engineering, Beijing University of Chemical Technology, Beijing100029, China

Corresponding author: Jingbo Zhao (zhaojb@mail.buct.edu.cn), Tel: +8610-6443-4864

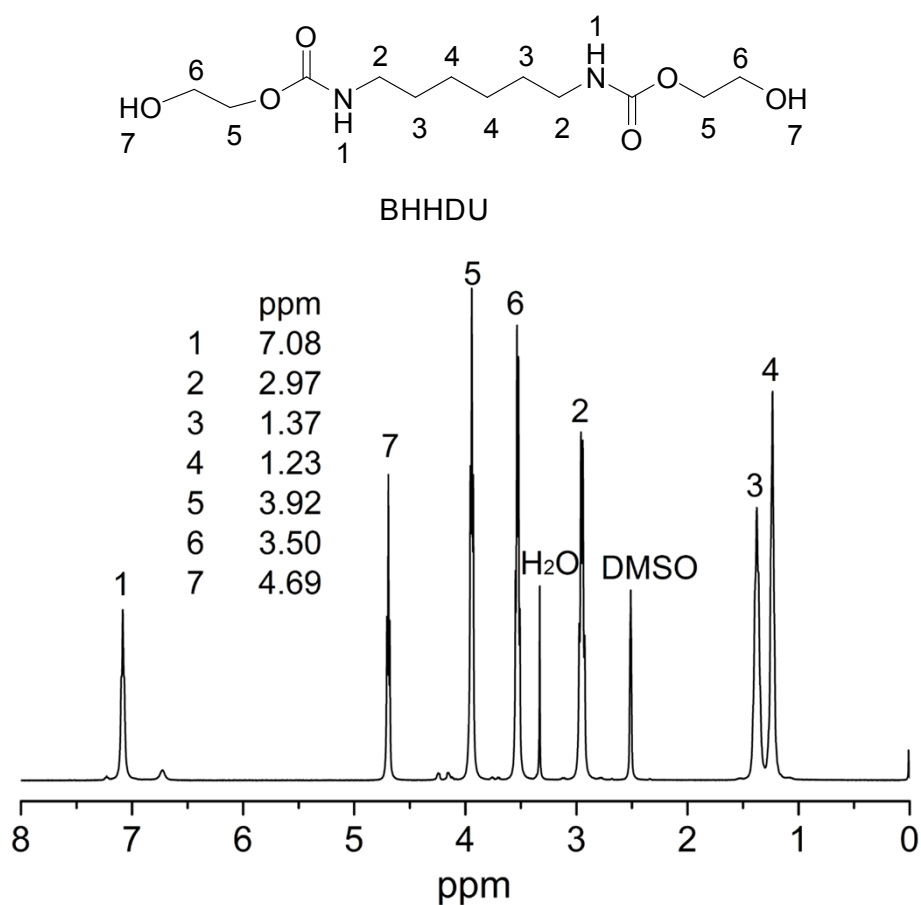

Fig. S1  $^1\text{H-NMR}$  spectrum of BHHDU

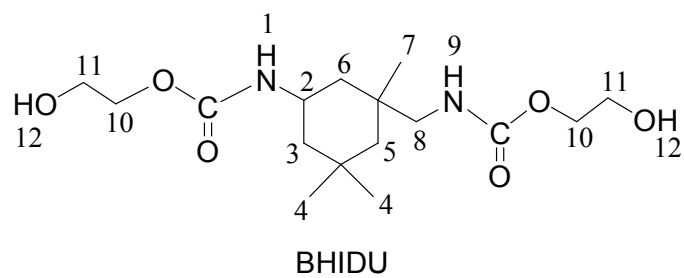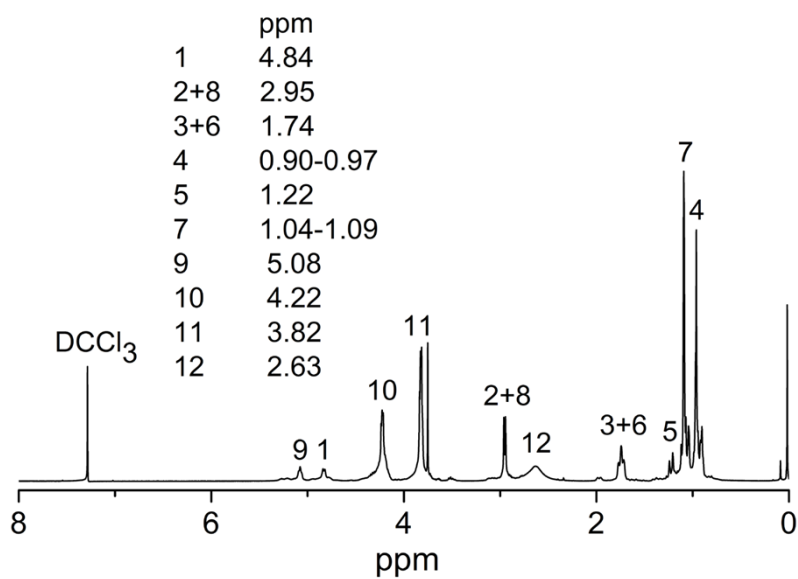

**Fig. S2** <sup>1</sup>H-NMR spectrum of BHIDU

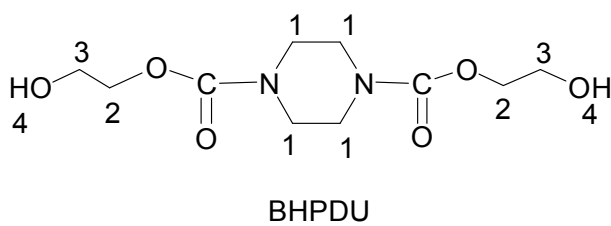

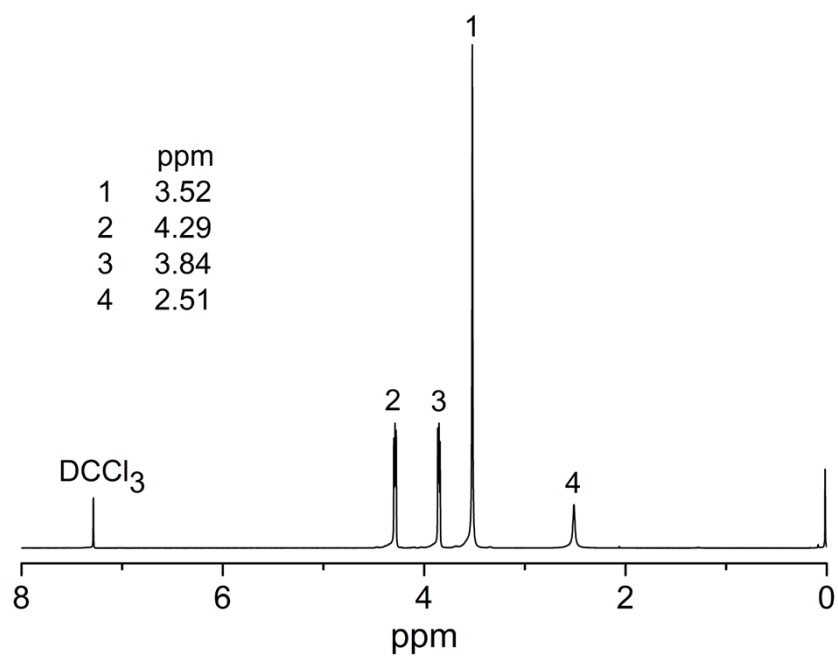

**Fig. S3** <sup>1</sup>H-NMR spectrum of BHPDU
